# Supplementary material for: Band inversion and switchable magnetic properties of two-dimensional RuClF/WSe2 van der Waals heterostructures
Source: Royal Society of Chemistry journal article supplement (doi:10.1039/d3cp05545k), 2023-12-05
Supplement: d3cp05545k1.pdf [file d3cp05545k1.pdf]

*Electronic Supplementary Information for*

**Band Inversion and Switchable Magnetic Properties of two-dimensional RuClF/WSe<sub>2</sub> van der Waals Heterostructures**

Ziyu Liu,<sup>a</sup> Baozeng Zhou,<sup>a</sup> Xiaocha Wang<sup>a,\*</sup> and Wenbo Mi<sup>b,\*</sup>

*<sup>a</sup>Tianjin Key Laboratory of Film Electronic & Communicate devices, School of Integrated Circuit Science and Engineering, Tianjin University of Technology, Tianjin 300384, China*

*<sup>b</sup>Department of Applied Physics, School of Science, Tianjin University, Tianjin 300354, China*

---

\* Author to whom all correspondence should be addressed.

E-mail: [wangxc@email.tjut.edu.cn](mailto:wangxc@email.tjut.edu.cn) and [miwenbo@tju.edu.cn](mailto:miwenbo@tju.edu.cn)

**Table S1** Calculated Lattice Constant:  $a_0$  (Å), Lattice mismatch rate:  $\delta$  (%), interlayer distance:  $d_0$  (Å), local Magnetic Moments:  $M$  ( $\mu_B$ ), Binding energy:  $E_b$  (eV).

| Stacking models | Stacking patterns | $a_0$ | $\delta$ | $d_0$ | $M$   | $E_b$  |
|-----------------|-------------------|-------|----------|-------|-------|--------|
| Model-1         | W-Ru-1            | 3.310 | 0.61     | 3.543 | 3.432 | -0.224 |
| Model-2         | W-F.top           | 3.309 | 0.61     | 3.539 | 3.429 | -0.264 |
| Model-3         | Se-Ru-1           | 3.310 | 0.61     | 3.544 | 3.428 | -0.273 |
| Model-4         | W-Ru'-1           | 3.310 | 0.61     | 3.551 | 3.428 | -0.262 |
| Model-5         | Se-Ru'-1          | 3.309 | 0.61     | 3.546 | 3.430 | -0.264 |
| Model-6         | W-Ru-2            | 3.323 | 0.61     | 3.748 | 3.336 | -0.239 |
| Model-7         | W-Cl.top          | 3.323 | 0.61     | 3.744 | 3.336 | -0.190 |
| Model-8         | Se-Ru-2           | 3.324 | 0.61     | 3.736 | 3.334 | -0.223 |
| Model-9         | W-Ru'-2           | 3.325 | 0.61     | 3.732 | 3.337 | -0.237 |
| Model-10        | Se-Ru'-2          | 3.324 | 0.61     | 3.741 | 3.336 | -0.227 |

**Table. S2** The lattice constants and atomic coordinates of RuClF/WSe<sub>2</sub>-model-3 heterostructure.

|             |                     |                    |                     |
|-------------|---------------------|--------------------|---------------------|
| <b>a[Å]</b> | 3.3101057765282484  | 0.0000000000000000 | 0.0000000000000000  |
| <b>b[Å]</b> | -1.6550528882641240 | 2.8666356917070352 | 0.0000000000000000  |
| <b>c[Å]</b> | 0.0000000000000000  | 0.0000000000000000 | 29.8030552301675442 |
| <b>Cl</b>   | 0.0000000000000000  | 0.0000000000000000 | 0.3910231726384690  |
| <b>F</b>    | 0.0000000000000000  | 0.0000000000000000 | 0.4918357503687479  |
| <b>Ru</b>   | 0.6666666870000029  | 0.3333333429999996 | 0.4481663407255119  |
| <b>Se</b>   | 0.6666666870000029  | 0.3333333429999996 | 0.7078638572085396  |
| <b>Se</b>   | 0.6666666870000029  | 0.3333333429999996 | 0.5950981142939543  |
| <b>W</b>    | 0.3333333429999996  | 0.6666666870000029 | 0.6514827447647733  |

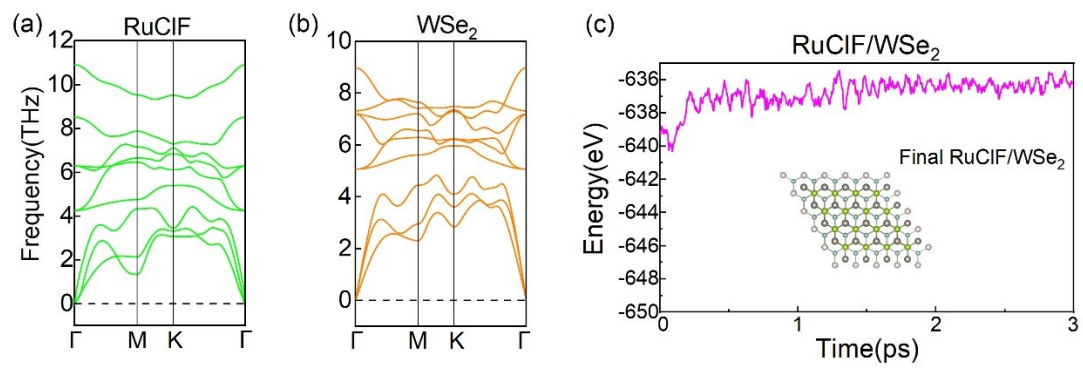

**Fig. S1** Phonon spectrum of (a) RuClF, (b) WSe<sub>2</sub> monolayers. (c) Simulation of potential energy fluctuations in RuClF/WSe<sub>2</sub> heterostructure after 3ps.

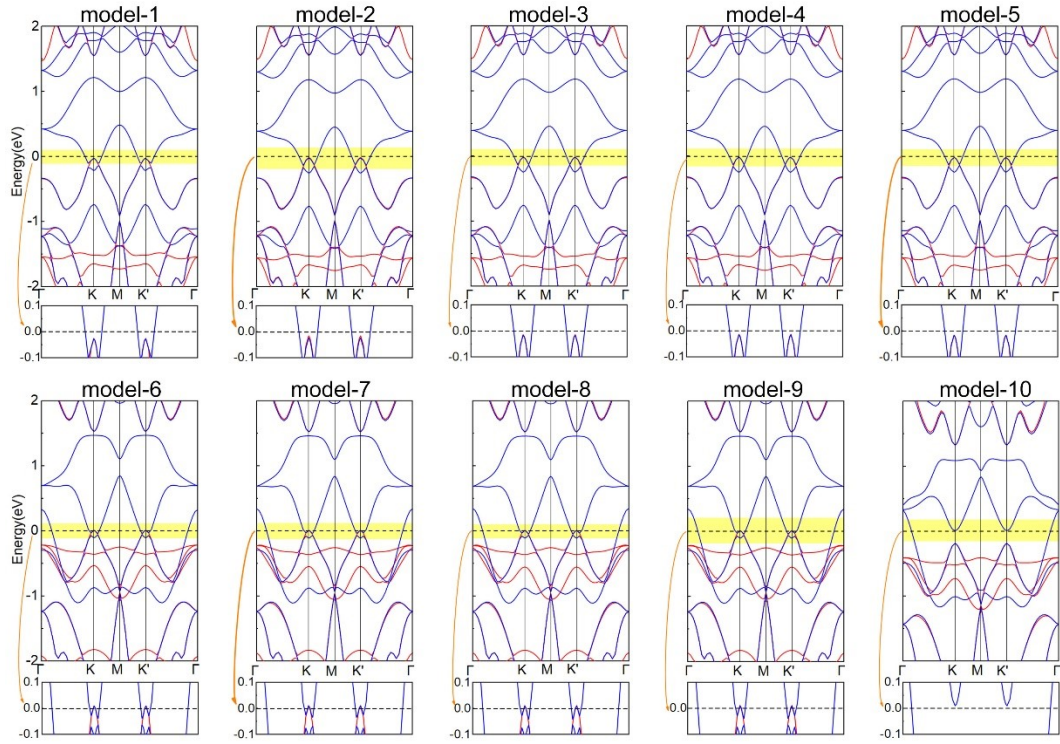

**Fig. S2** Band structures of RuClF/WSe<sub>2</sub> heterostructures without SOC with different stacking models.

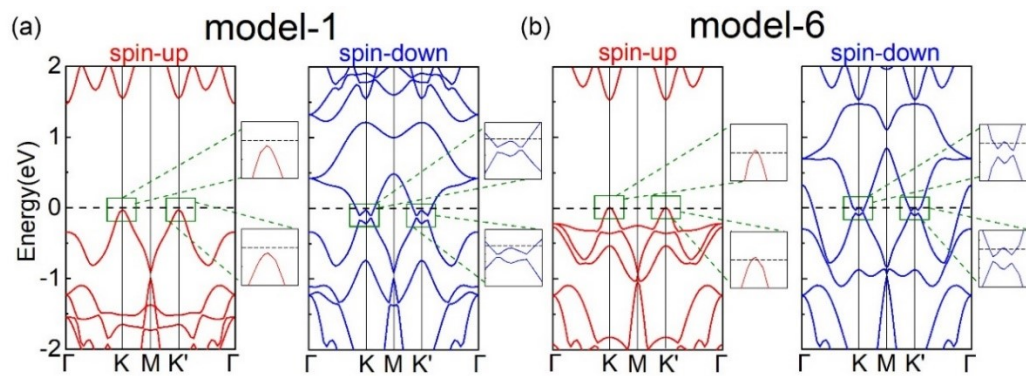

**Fig. S3** Band structures of spin-up and spin-down channels of (a) RuClF/WSe<sub>2</sub>-model-1 and (b) RuClF/WSe<sub>2</sub>-model-6 heterostructures.

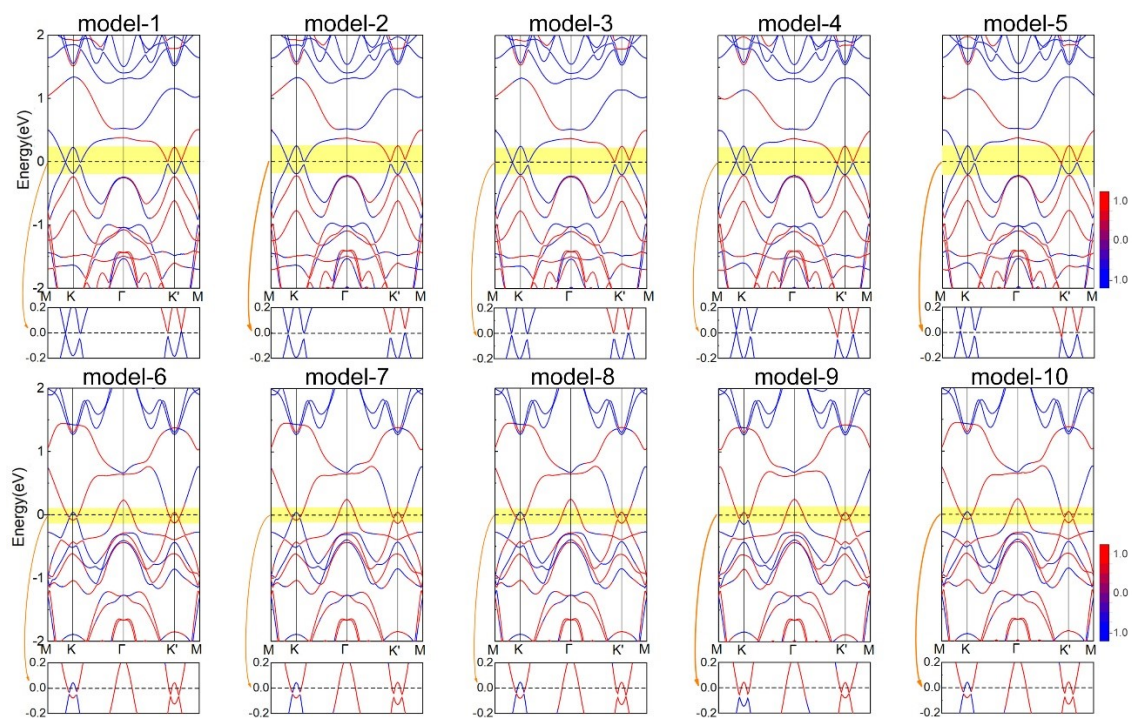

**Fig. S4** Band structures of RuClF/WSe<sub>2</sub> heterostructures with SOC with different stacking models.

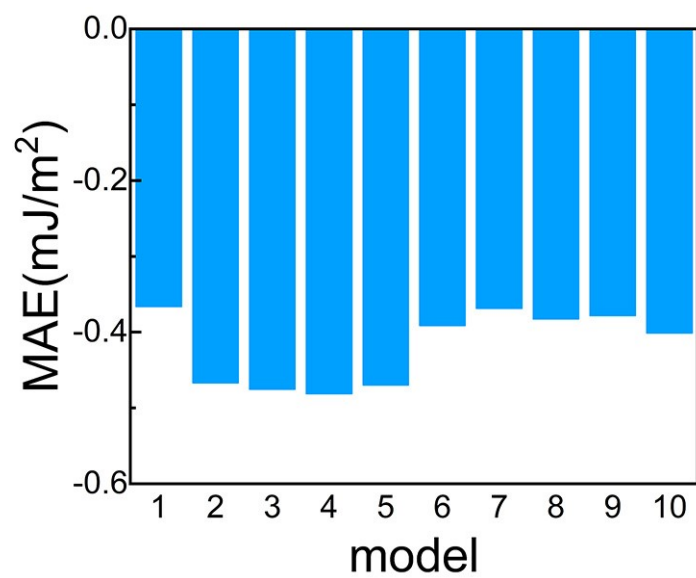

**Fig. S5** Total magnetic anisotropy of RuClF/WSe<sub>2</sub> heterostructures with different stacking models.



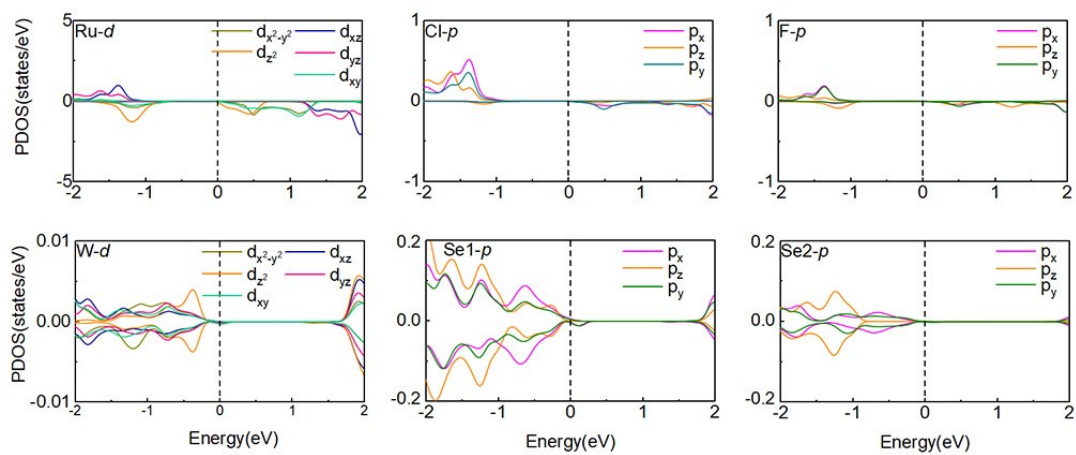

**Fig. S6** PDOS of each element of RuClF/WSe<sub>2</sub> heterostructure. The Fermi level is set as 0eV.
